# Supplementary material for: Effect of hospital-at-home vs. traditional brick-and-mortar hospital care in acutely ill adults: study protocol for a pragmatic randomized controlled trial
Source: Springer Nature journal article supplement (doi:10.1186/s13063-022-06430-6), 2022-06-16
Supplement: MOESM3 [file 23172438]

Clinical Stability Screen

| <b>Must be NO:</b>                                                                                                                                                                                                                                                                                                                                                                                                                                                                                                                                                                                                                                                                                                                                                                                                                                                                                                                                                                                                                        | <b>Yes</b> | <b>No</b> | <b>Comment</b> |
|-------------------------------------------------------------------------------------------------------------------------------------------------------------------------------------------------------------------------------------------------------------------------------------------------------------------------------------------------------------------------------------------------------------------------------------------------------------------------------------------------------------------------------------------------------------------------------------------------------------------------------------------------------------------------------------------------------------------------------------------------------------------------------------------------------------------------------------------------------------------------------------------------------------------------------------------------------------------------------------------------------------------------------------------|------------|-----------|----------------|
| <p>Low diagnostic certainty requiring advanced diagnostics that cannot be performed in the home</p> <p>If yes, select reason (if "other", select and describe):</p> <ul style="list-style-type: none"> <li><input type="checkbox"/> Active live telemetry monitoring</li> <li><input type="checkbox"/> Advanced imaging required (CT, MRI, nuclear stress)</li> <li><input type="checkbox"/> Cardiac catheterization required</li> <li><input type="checkbox"/> EGD/Colonoscopy required</li> <li><input type="checkbox"/> Lab monitoring not amenable to home (troponin, &gt;q12 labs)</li> <li><input type="checkbox"/></li> <li>Other _____</li> </ul>                                                                                                                                                                                                                                                                                                                                                                                 |            |           |                |
| <p>Higher acuity medical services may be required making admission to home clinically unsafe</p> <p>If yes, select reason (if "other", select and describe):</p> <ul style="list-style-type: none"> <li><input type="checkbox"/> Intensive care unit required (i.e. vitals checked &gt;q4hr, BG checked &gt;q2hr, active drip titration etc.)</li> <li><input type="checkbox"/> Intubation risk elevated (i.e. history of intubation for respiratory conditions)</li> <li><input type="checkbox"/> New tracheostomy or mechanical ventilation required</li> <li><input type="checkbox"/> Vasopressor risk elevated (i.e. reasonable risk of fluid refractory hypotension)</li> <li><input type="checkbox"/> Unstable arrhythmias</li> <li><input type="checkbox"/> Elevated risk of respiratory compromise increasing risk of needing support with noninvasive positive pressure ventilation or intubation</li> <li><input type="checkbox"/> Home IV access limitations</li> <li><input type="checkbox"/></li> <li>Other _____</li> </ul> |            |           |                |
| <p>Specific services required that cannot be Provided in the Home</p> <p>If yes, select reason (if "other", select and describe):</p> <ul style="list-style-type: none"> <li><input type="checkbox"/> Risk for inability to obtain IV access</li> <li><input type="checkbox"/> Daily involvement of in person specialty consultation</li> <li><input type="checkbox"/> Blood transfusions likely to be needed (i.e. active GI bleed)</li> <li><input type="checkbox"/> Hemodialysis likely to be required (i.e. already on HD or newly anuric/severe ATN)</li> </ul>                                                                                                                                                                                                                                                                                                                                                                                                                                                                      |            |           |                |

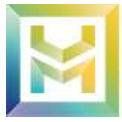

|                                                                                                                                                                                                                                                                                                                                                                                                                                                                                                                                                                                                            |  |  |  |
|------------------------------------------------------------------------------------------------------------------------------------------------------------------------------------------------------------------------------------------------------------------------------------------------------------------------------------------------------------------------------------------------------------------------------------------------------------------------------------------------------------------------------------------------------------------------------------------------------------|--|--|--|
| <input type="checkbox"/> Respiratory isolation/airborne precautions (high TB concern)<br><input type="checkbox"/> Pain such that would require adjustment of opiates or need for IV therapy<br><input type="checkbox"/> Chronic need for 24/7 care that is currently not in place in the home setting<br><input type="checkbox"/><br>Other _____                                                                                                                                                                                                                                                           |  |  |  |
| <p>Surgical/IR procedure required that cannot be performed in the home</p> <p>If yes, select reason (if "other", select and describe):</p> <input type="checkbox"/> Surgical consultation required or high risk of being required<br><input type="checkbox"/> Intraabdominal abscess requiring drainage (an example)<br><input type="checkbox"/> Percutaneous nephrostomy tube placement (an example)<br><input type="checkbox"/> Thoracentesis for parapneumonic effusion (an example)<br><input type="checkbox"/> Significant surgical wound debridement<br><input type="checkbox"/><br>Other _____<br>— |  |  |  |
| <p>Clinical partnership with patient and family untenable to safely care for patient</p> <p>If yes, select reason (if "other", select and describe):</p> <input type="checkbox"/> Severe altered mental status unable to be managed safely at home with family and home health aide (an example)<br><input type="checkbox"/> Active substance abuse (an example)<br><input type="checkbox"/> History of or high risk of noncompliance with primary treatment plan<br><input type="checkbox"/><br>Other _____<br>—                                                                                          |  |  |  |
| <p>Is the patient currently on hospice or have a life expectancy of &lt;= 6 mo.?</p>                                                                                                                                                                                                                                                                                                                                                                                                                                                                                                                       |  |  |  |
