# Supplementary material for: Effect of hospital-at-home vs. traditional brick-and-mortar hospital care in acutely ill adults: study protocol for a pragmatic randomized controlled trial
Source: Springer Nature journal article supplement (doi:10.1186/s13063-022-06430-6), 2022-06-16
Supplement: MOESM4 [file 23172438]

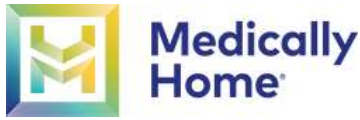

## Social Stability Screen

Complete for ALL Programs

| <b>Must be YES:</b>                                                                                                                                       | Yes | No | N/A | Comment |
|-----------------------------------------------------------------------------------------------------------------------------------------------------------|-----|----|-----|---------|
| Does the patient have a home recovery environment?                                                                                                        |     |    |     |         |
| Is the patient's home recovery environment in an eligible geography?                                                                                      |     |    |     |         |
| Does the patient's home have water, electricity, bathroom, heat/ac, refrigerator?                                                                         |     |    |     |         |
| Does the patient feel safe at home?                                                                                                                       |     |    |     |         |
| Are family/caregivers willing to participate, as needed, while the patient participates in the MH program?                                                |     |    |     |         |
| Is there a person in the home (patient or other) willing/able to take vital signs and answer phone calls?                                                 |     |    |     |         |
| Is the patient willing to put pets in a secure area while MH affiliated staff are in the home?                                                            |     |    |     |         |
| Is patient willing/able to participate in the MH program (this includes MH affiliated staff entering the home, and MH home equipment set-up in the home)? |     |    |     |         |
| Is the patient/patient's HCP willing/able to sign consent?                                                                                                |     |    |     |         |

| <b>Informative Questions:</b>                                                                                     | Yes | No | N/A | Comment |
|-------------------------------------------------------------------------------------------------------------------|-----|----|-----|---------|
| Does the patient have internet at home and a cell phone?                                                          |     |    |     |         |
| Does the patient live in a stand-alone house or in a community setting? <i>Options: house, apartment, other</i>   |     |    |     |         |
| What floor does the patient live on?                                                                              |     |    |     |         |
| How many steps are there to enter the home?                                                                       |     |    |     |         |
| Is there an elevator at the home?                                                                                 |     |    |     |         |
| Are there stairs within the home? <i>If yes-how many?</i>                                                         |     |    |     |         |
| Does the patient live alone?                                                                                      |     |    |     |         |
| Is there anyone who assists the patient with day to day life? <i>If yes-describe</i>                              |     |    |     |         |
| Does the patient currently have any home services?                                                                |     |    |     |         |
| Is the patient likely to require >4 hrs. of HHA support to fill ADL needs?                                        |     |    |     |         |
| Does the patient have mild, or greater, cognitive impairment?                                                     |     |    |     |         |
| Has the patient experienced a fall within the last 6 mo.? <i>If yes, explain:</i>                                 |     |    |     |         |
| Is the patient homebound?                                                                                         |     |    |     |         |
| Is the NIDA Quick Screen positive for the patient? <i>(see below for NIDA Quick Screen; if positive- explain)</i> |     |    |     |         |



|                                                                                                                                               |  |  |  |  |
|-----------------------------------------------------------------------------------------------------------------------------------------------|--|--|--|--|
| Is the NIDA Quick Screen positive for the anyone living in the patient's home? <i>(see below for NIDA Quick Screen; if positive- explain)</i> |  |  |  |  |
| Is the patient's primary language English? <i>If no, what is the patient's primary language?</i>                                              |  |  |  |  |

| <b>Must be NO:</b>                                                                           | Yes | No | N/A | Comment |
|----------------------------------------------------------------------------------------------|-----|----|-----|---------|
| Are there any behavioral diagnosis that would limit patient participation in the MH program? |     |    |     |         |
| Does the patient require 1:1 aid with feeding or daily speech therapy?                       |     |    |     |         |
| Does the patient require 1:1 aid with toileting and lack home assistance?                    |     |    |     |         |
| Is the patient or caregiver unable to call for help or push the emergency help device?       |     |    |     |         |
| Is there active smoking in the home and need for home Oxygen?                                |     |    |     |         |
| Are there unsecured firearms in the home?                                                    |     |    |     |         |
| Does the patient exhibit signs of neglect suggestive of an unsafe home?                      |     |    |     |         |
| Is the patient deaf?                                                                         |     |    |     |         |

**NIDA Quick Screen:**  
In the past year, how many times have you used the following....

|                                                                                            | Never | Once or Twice | Monthly | Weekly | Almost Daily or Daily | Comment |
|--------------------------------------------------------------------------------------------|-------|---------------|---------|--------|-----------------------|---------|
| Alcohol (for men, 5 or more drinks in a day; for women, 4 or more drinks in a day)         |       |               |         |        |                       |         |
| Tobacco Products                                                                           |       |               |         |        |                       |         |
| Prescription Drugs for Nonmedical Reasons                                                  |       |               |         |        |                       |         |
| Illegal Drugs (if in a state where marijuana is legal, specifically ask re: marijuana use) |       |               |         |        |                       |         |

Complete for SNF Substitution Program ONLY

| <b>Must be YES:</b>                                    | Yes | No | N/A | Comment |
|--------------------------------------------------------|-----|----|-----|---------|
| Has the patient been recommended for discharge to SNF? |     |    |     |         |

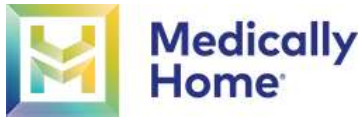

|                                                                                                                                            |  |  |  |  |
|--------------------------------------------------------------------------------------------------------------------------------------------|--|--|--|--|
| Are the patient/caregivers aware that HHA support provided by the MH program is temporary?                                                 |  |  |  |  |
| Does the patient's home have sufficient space/appropriate condition for rehab needs?                                                       |  |  |  |  |
| Are caregivers willing to aid the patient w/ADLs during the patient's time in the MH program and post d/c from the MH program (if needed)? |  |  |  |  |

| <b>Must be NO:</b>                                                                                 | <b>Yes</b> | <b>No</b> | <b>N/A</b> | <b>Comment</b> |
|----------------------------------------------------------------------------------------------------|------------|-----------|------------|----------------|
| Has the patient been previously recommended for long-term care?                                    |            |           |            |                |
| Does the patient live at a SNF/SAR/LTAC?                                                           |            |           |            |                |
| Does the patient no longer prefer to live at home after the hospital/SNF stay?                     |            |           |            |                |
| Has the patient required a 1:1 sitter in the last 48 hours?                                        |            |           |            |                |
| Has PT deemed the patient to be either a maximum assist or two assists in any functional category? |            |           |            |                |

Complete for ALL Programs

| <b>Must be YES:</b>               | <b>Yes</b> | <b>No</b> | <b>N/A</b> | <b>Comment</b> |
|-----------------------------------|------------|-----------|------------|----------------|
| Did the patient pass this screen? |            |           |            |                |
